# Supplementary material for: Conditional Loss of the Exocyst Component exoc5 in Retinal Pigment Epithelium (RPE) Results in RPE Dysfunction, Photo-Receptor Cell Degeneration, and Decreased Visual Function.
Source: Preprints.org preprint supplement (doi:10.20944/preprints202104.0191.v1), 2021-04-07
Supplement: Supplementary file 1 [file supplementary]

## SUPPLEMENTARY FIGURES and LEGENDS

# Conditional loss of the exocyst component Exoc5 in retinal pigment epithelium (RPE) results in RPE dysfunction, photoreceptor cell degeneration, and decreased visual function.

Bärbel Rohrer<sup>1,2#</sup>, Elisabeth Obert<sup>1</sup>, Yujing Dang<sup>3</sup>, Yanhui Su<sup>3</sup>, Xiaofeng Zuo<sup>3</sup>, Ben Fogelgren<sup>4</sup>, Manas R. Biswal<sup>5</sup>, Altaf A. Kondkar<sup>6</sup>, Glenn P. Lobo<sup>1,3,7\*#</sup> and Joshua H. Lipschutz<sup>1,8#</sup>

<sup>1</sup>Department of Ophthalmology, Medical University of South Carolina, Charleston, SC, 29425, USA.

<sup>2</sup>Ralph H. Johnson VA Medical Center, Division of Research, Charleston, SC 29401. <sup>3</sup>Department of Medicine, Medical University of South Carolina, Charleston, SC, 29425, USA. <sup>4</sup>

Department of Anatomy, Biochemistry, and Physiology, University of Hawaii at Manoa, Honolulu, HI 96813, USA.

<sup>5</sup>Department of Pharmaceutical Sciences, Taneja College of Pharmacy, University of South Florida, Tampa, FL 33612, USA.

<sup>6</sup>Department of Ophthalmology, College of Medicine, King Saud University, Riyadh 11411, Saudi Arabia.

<sup>7</sup>Department of Ophthalmology and Visual Neurosciences. Lions Research Building, 2001 6th Street SE., Room 225, University of Minnesota, Minneapolis, MN 55455, USA.

<sup>8</sup>Department of Medicine, Ralph H. Johnson Veterans Affairs Medical Center, Charleston SC, 29425, USA.

**\*Corresponding Author:** Glenn P. Lobo, Ph.D., Associate Professor, Department of Ophthalmology and Visual Neurosciences, Lions Research Building, 2001 6th Street SE., Room LRB 225 University of Minnesota Minneapolis, MN 55455, USA. E-mail: [lobo0023@umn.edu](mailto:lobo0023@umn.edu).

# equally supervised this work

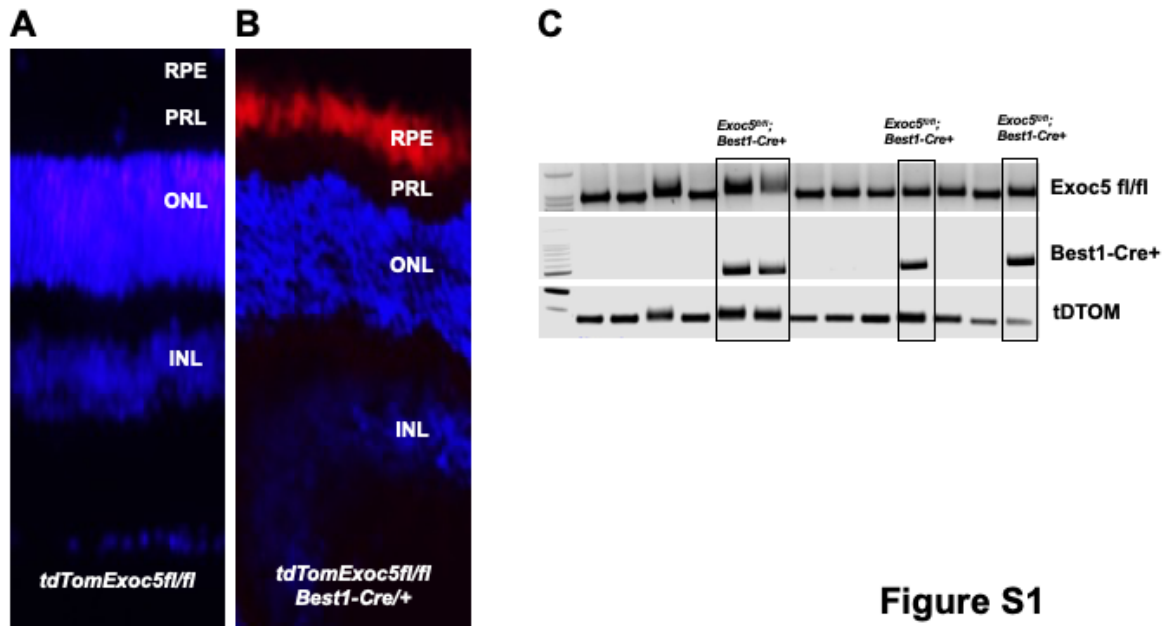

**Figure S1**

Supplementary Fig. S1: Generation of *tdTomatoExoc5fl/fl* mice and genotyping for conditional *tdTomatoExoc5fl/fl;Best1-Cre<sup>+</sup>* mice. (A) No tdTomato expression (red) was seen in *tdTomatoExoc5fl/fl* mice, (B) while tdTomato expression (red color in RPE) occurred in *tdTomato Exoc5fl/fl;Best1-Cre/+* mice, confirming conditional loss of EXOC5 in RPE cells. (C) PCR based genotyping for identification of control *tdTomatoExoc5fl/fl* and experimental *tdTomatoExoc5fl/fl;Best1-Cre/+* mice.

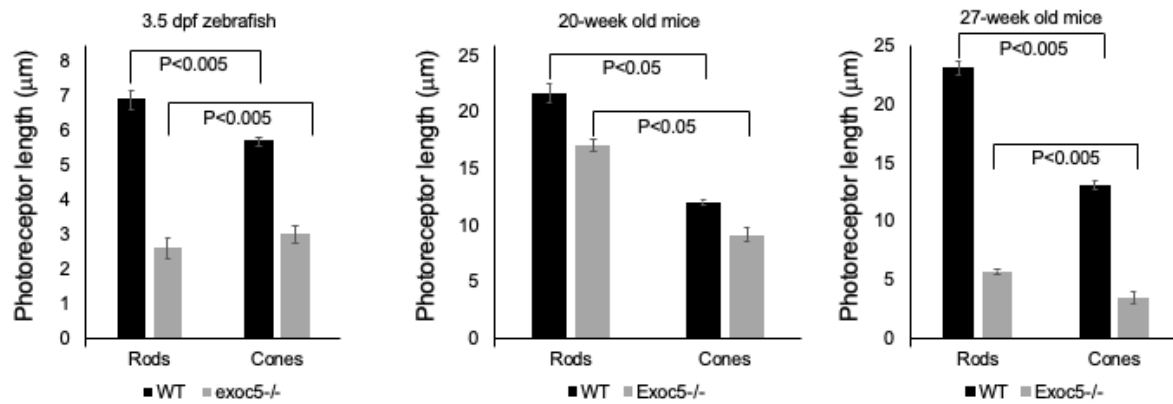

**Figure S2**

**Supplementary Fig. S2: Quantification of photoreceptor lengths.** (A) 3.5 days post fertilization (dpf) zebrafish, (B) 20-week old *Exoc5*<sup>-/-</sup> and WT mice, and (C) 27-week old *Exoc5*<sup>-/-</sup> and WT mice.

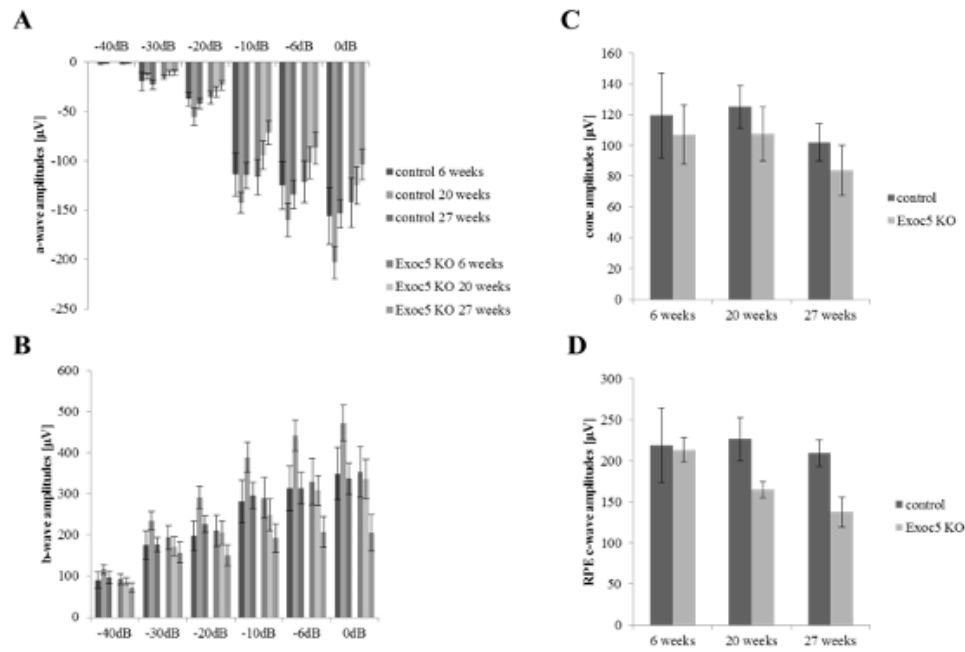

**Figure S3**

Supplementary Fig. S3: Measurement of visual function in *Exoc5*<sup>fl/fl</sup>;*Best1*-*Cre*<sup>+</sup> mice by full-field Electroretinography (ERG) and c-wave function. Data are expressed as mean ± SEM (*Exoc5*<sup>fl/fl</sup>;*Best1*-*Cre*<sup>-</sup>: n=10; and *Exoc5*<sup>fl/fl</sup>;*Best1*-*Cre*<sup>+</sup> mice: n=10).
